# Supplementary material for: Mechanism of alternative splicing through competing 5’ splice sites
Source: Research Square preprint supplement (doi:10.21203/rs.3.rs-7007499/v1), 2025-07-18
Supplement: Supplementary file 1 [file 8b5f59a5ca9c57d3efb29bc9.docx]

Extended Data Figures

**Mechanism of alternative splicing through competing 5’ splice sites**

Ankita Katoch Banyal, Poulami Choudhuri, Balashankar R Pillai, Amjadudheen Varikkapulakkal, and Shravan Kumar Mishra


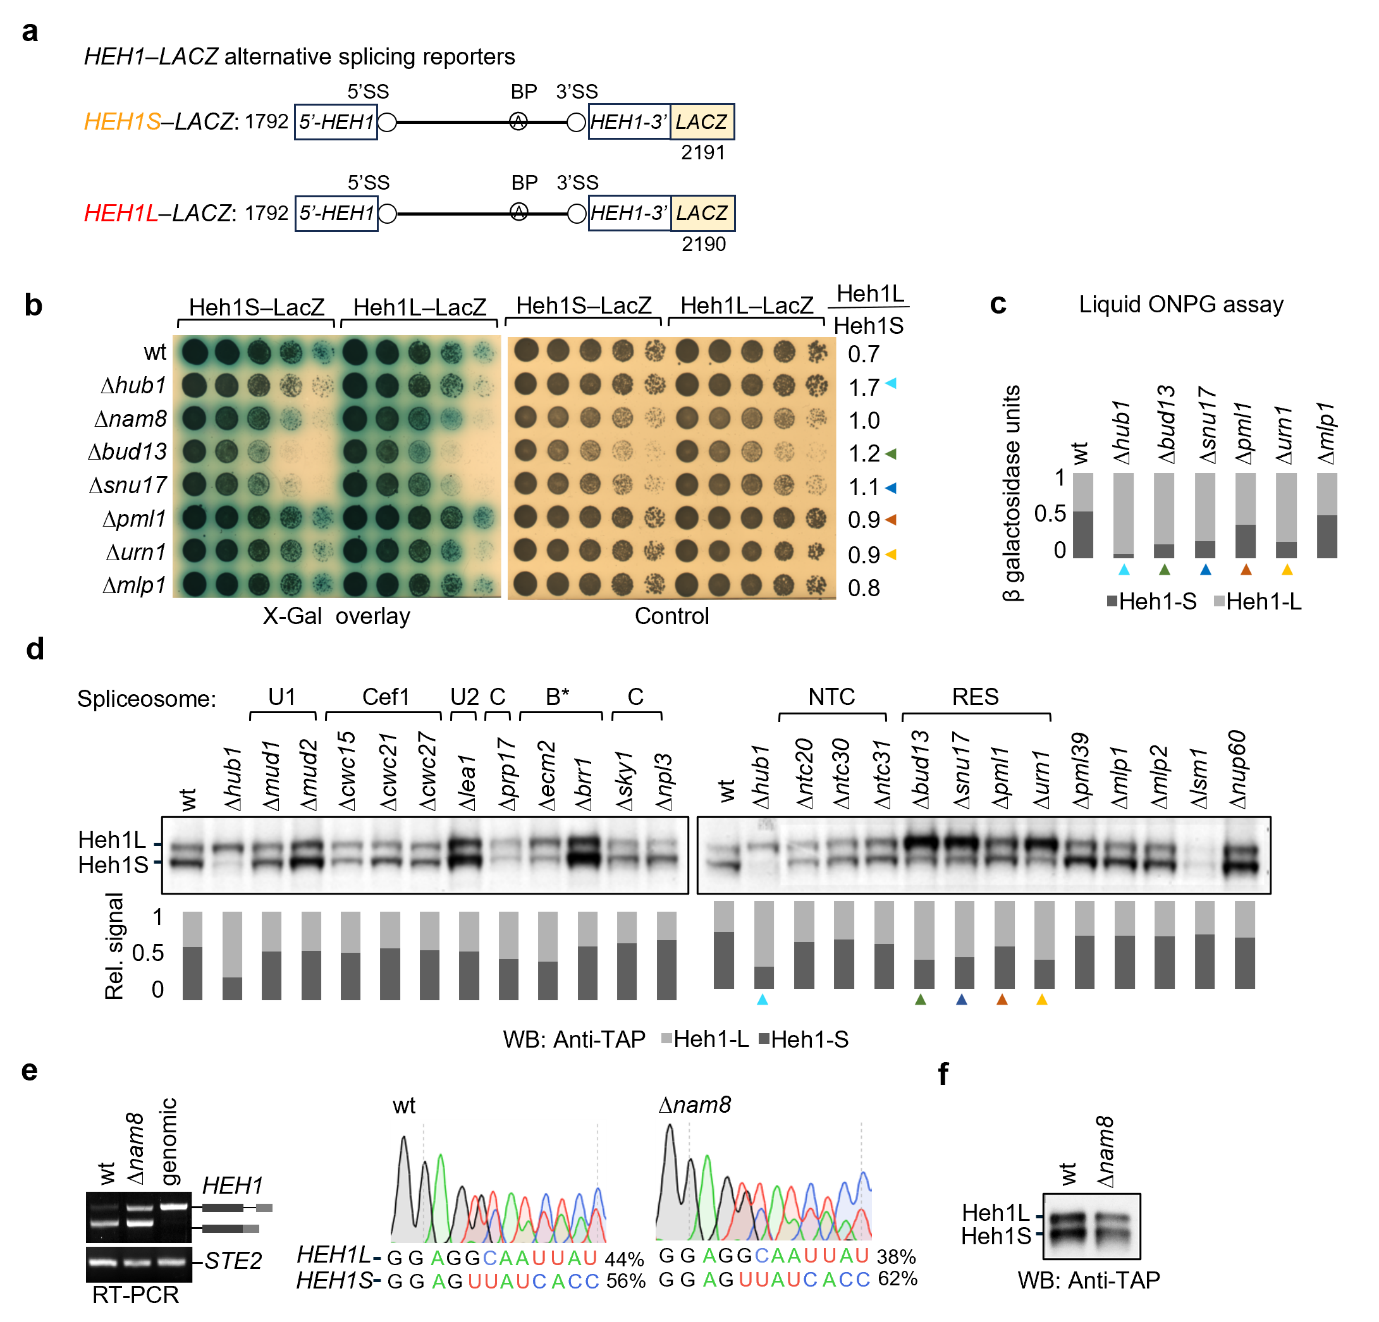


**Extended Data Fig. 1: *HEH1* alternative splicing factors. (a-f)** Screening of yeast deletion strains to identify trans-acting proteins for *HEH1* alternative splicing.

**(a)** Schematic showing the *HEH1*–*LACZ* alternative splicing reporters. Reporters modified from the *RP51*–*LACZ* reporter1 and designed in a way to specifically monitor the usage of *HEH1S* and *HEH1L* 5’SS. 1 nucleotide is less in *HEH1L*–*LACZ* to bring *HEH1L* 5’SS in frame with *LACZ*. **(b)** β-galactosidase activity was observed on both solid and liquid media. Spot assay of the transformants with splicing reporters was performed on the selection marker plate and overlayed with X-gal. The intensity of blue color, indicative of β-galactosidase activity, correlated with the splicing efficiency. **(c)** Liquid ONPG assay for the indicated strains with splicing reporters. **(d)** Heh1 protein isoforms from N-terminally TAP-tagged *HEH1* in deletion mutants of splicing factors representative of different spliceosomal complexes were monitored by western blots. RT-PCR followed by cDNA sequencing **(e)** andwestern blot **(f)** showed normal *HEH1* mRNA and protein isoforms in *Dnam8*, thus ruling out Nam8’s (a U1snRNP component) in alternative 5’SS selection. Triangles (▲) with color codes indicate alternative splicing defect observed in different stains in figures b, c, and d.

**
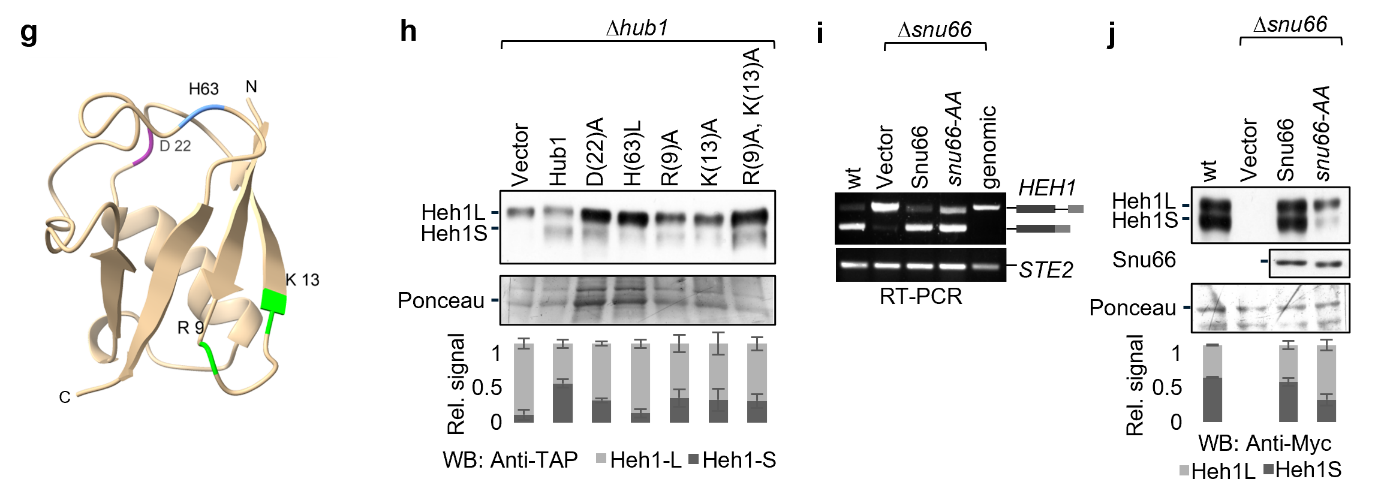
Extended Data Fig. 1: *HEH1* alternative splicing factors. (g-j)** Hub1 and Snu66 surfaces are involved in *HEH1* alternative splicing.

**(g)** AlphaFold predicted structure of yeast Hub1 highlighting its Snu66 binding surface D22, Prp5 binding surface H63, and its presumed RNA binding surfaces R9 and K13. **(h)** *D hub*1 strain was transformed with the indicated Hub1 mutants,and Heh1 protein was examined by western blot. Data shown as mean ± s.d. (n=3 independent repeats). **(i)** RT-PCR and **(j)** western blot analysis of wild type (wt), *∆snu66,* and *snu66-AA* strains. *snu66-AA* refers to Hub1 binding deficient R16A and R47A variant. Data shown as mean ± s.d. (n=3 independent repeats).


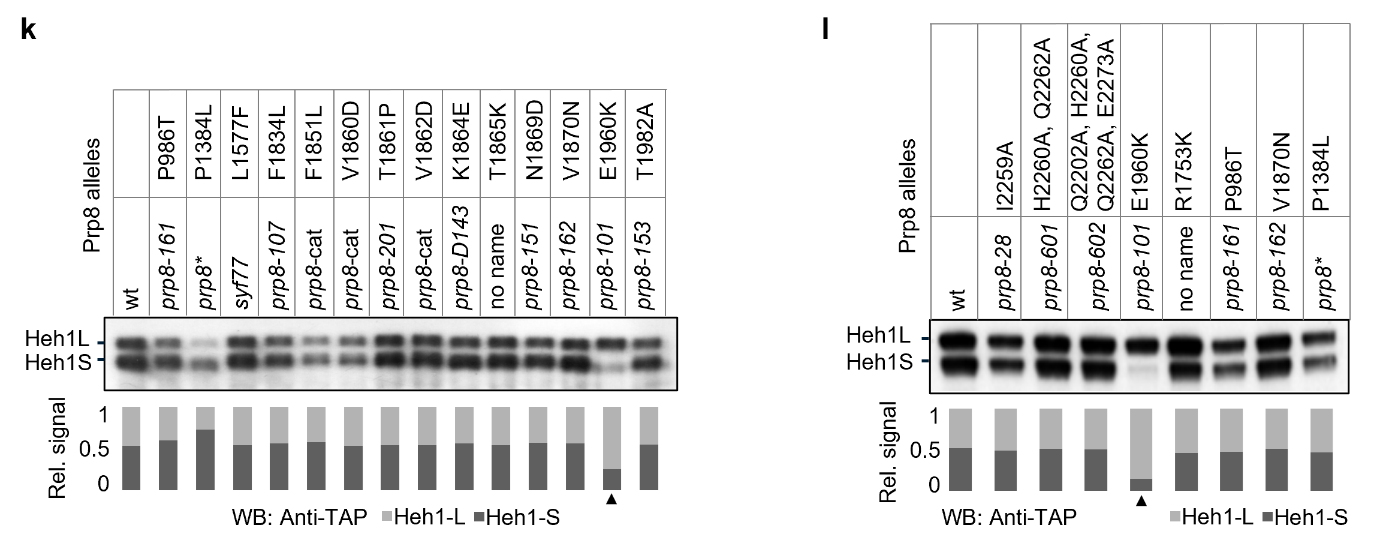


**Extended Data Fig. 1: *HEH1* alternative splicing factors. (k-l)** Screening of Prp8 alleles for defects in *HEH1* alternative splicing.

Different alleles of the core splicing factor Prp8 were screened by western blot for the *HEH1* alternative splicing defect. The upward triangle (▲) points at the allele showing the alternative splicing defect.


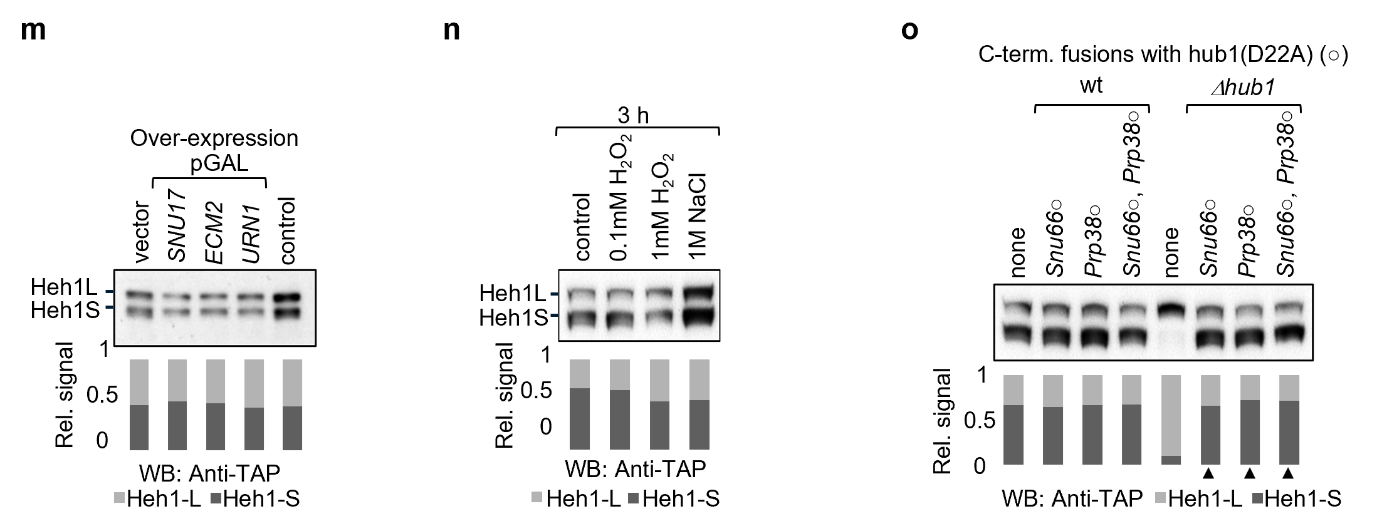


**Extended Data Fig. 1: *HEH1* alternative splicing factors. (m-o)** Overexpression of the trans-acting factor does not alter *HEH1* 5’SS selection.

**(m)** *SNU17*, *ECM2,* and *URN1* were expressed in the *wt* strain. Transformants were induced for 5-6 h in 1% galactose media, harvested, and tested for their effect on *HEH1* alternative splicing. (**n)** The effect of stress-induced upregulation of Hub1 on *HEH1* alternative splicing was tested by western blot. **(o)** indicated factors screened by Western blot in the wt and *∆hub1* strains*.* ○indicates C-terminal fusion of *hub1(D22A)* with the splicing factors. Upward triangles (▲) indicate proteins that rescued *HEH1* alternative splicing

**
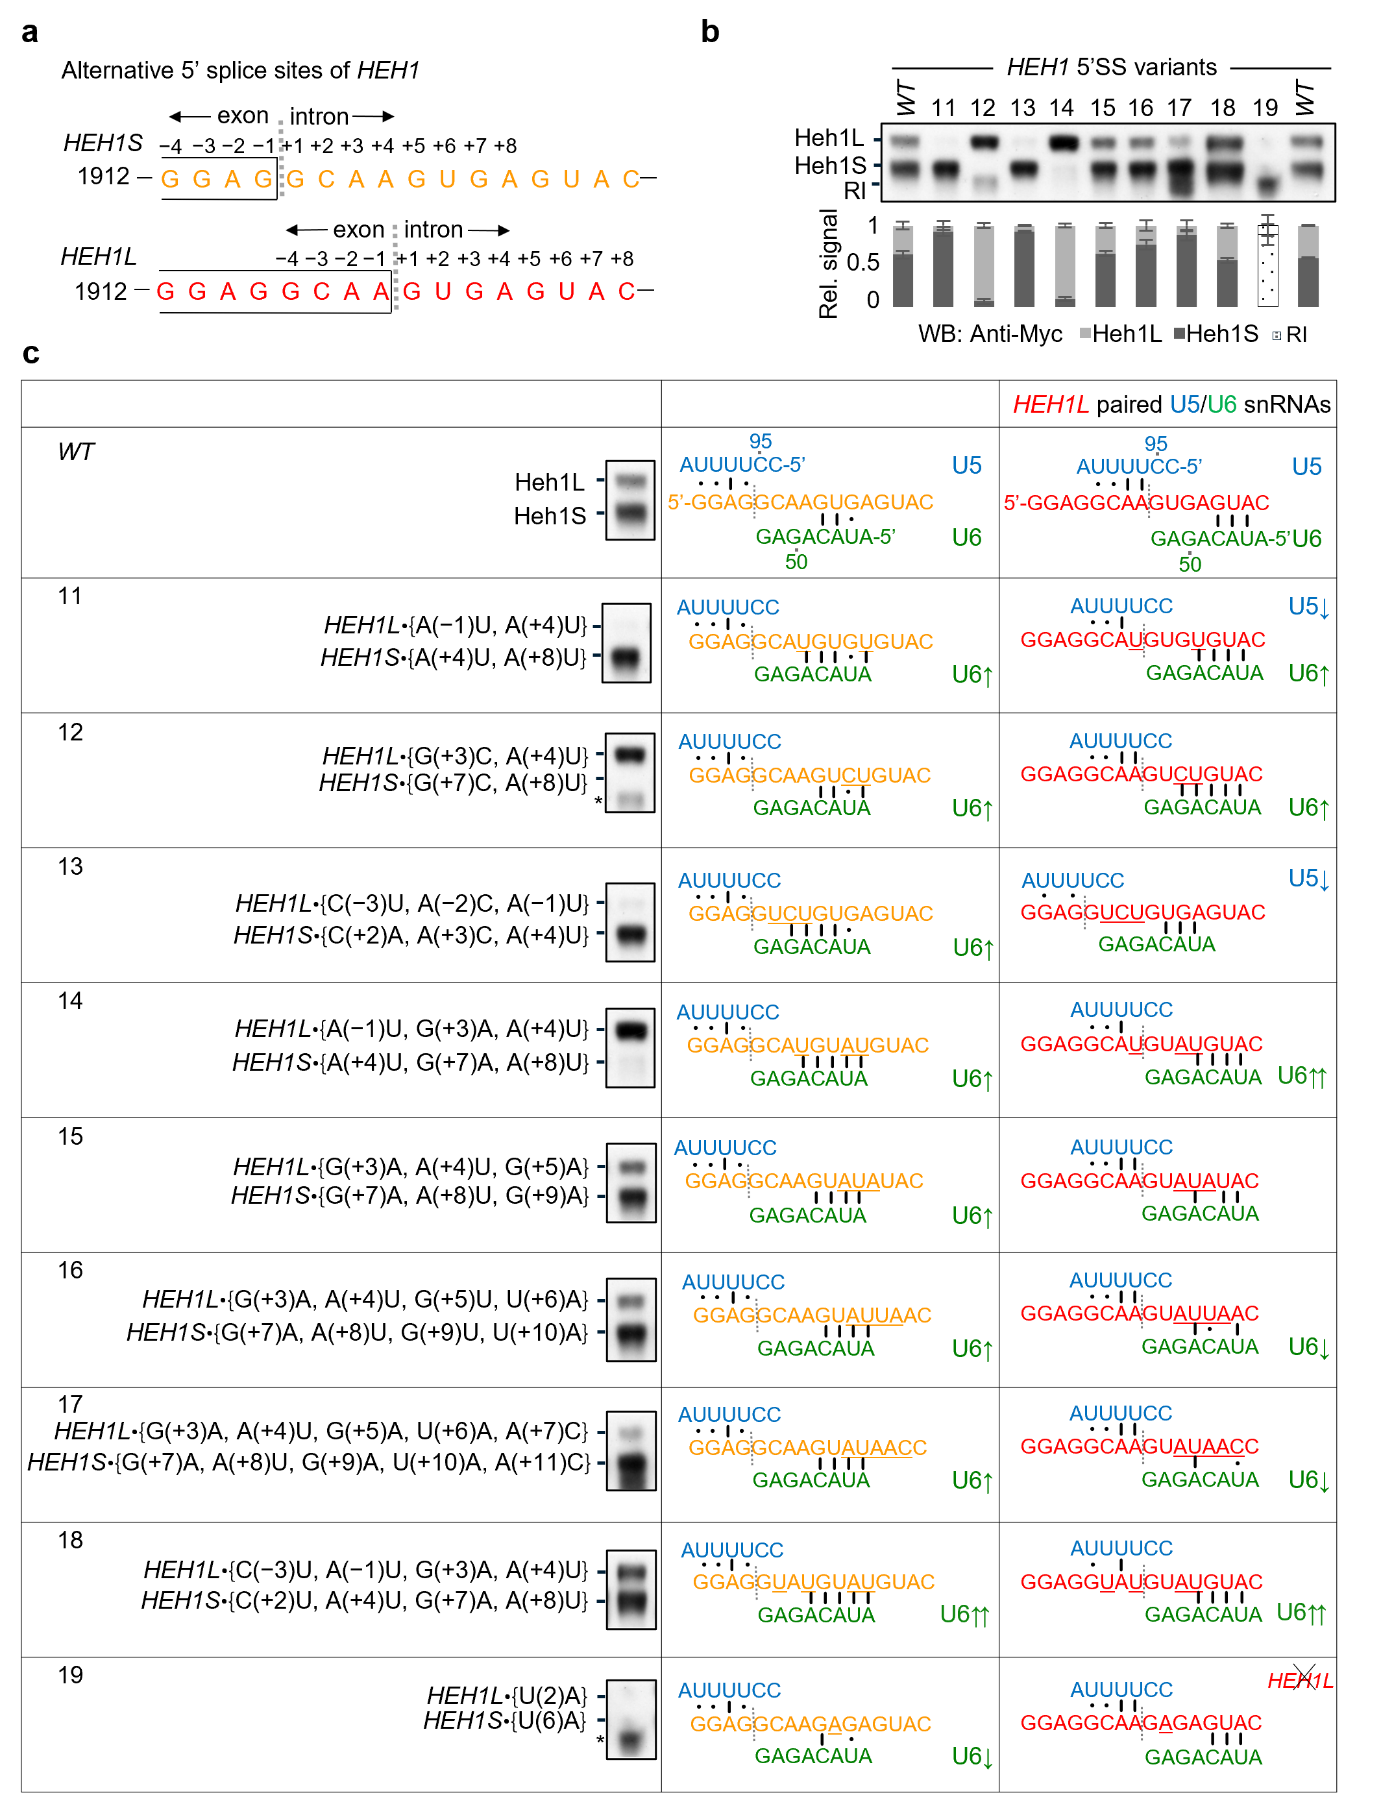
**

**Extended Data Fig. 2: Pairing of pre-mRNA variants with U5 and U6 snRNA and the outcome of *HEH1* alternative splicing. (a-c)** Sequence at the exon-intron boundary determines 5’SS selection.

**(a)** The 16-nucleotide segment at the exon/intron (1913-1926) boundary of *HEH1* was investigated for alternative splicing. The sequence was selected based on reporter assays described earlier, pairing of U5 snRNA loop1 and U6 snRNA ACAGA box. *HEH1S* (orange color) and *HEH1L* (red color) sequences represent isoforms of *HEH1* pre-mRNA. **(b)** More than one mutation was introduced based on U5 and U6 snRNA binding strength to both the 5’SS. The impact of the U5 and U6 interaction change on *HEH1* alternative splicing was monitored in western blots. Data shown as mean ± s.d. (n=3 independent repeats).RI (retained intron) represents the *HEH1* pre-mRNA band. **(c)** Pre-mRNA variants with respective U5 snRNA (blue colour) and U6 snRNA (green colour) pairing. The mutants were analyzed for presumed U5 and U6 snRNA pairings, adapted from2,3. x indicates no *HEH1L* protein in the variant. Western blot lanes are taken from (b). Labels are the same as in Figure 1.


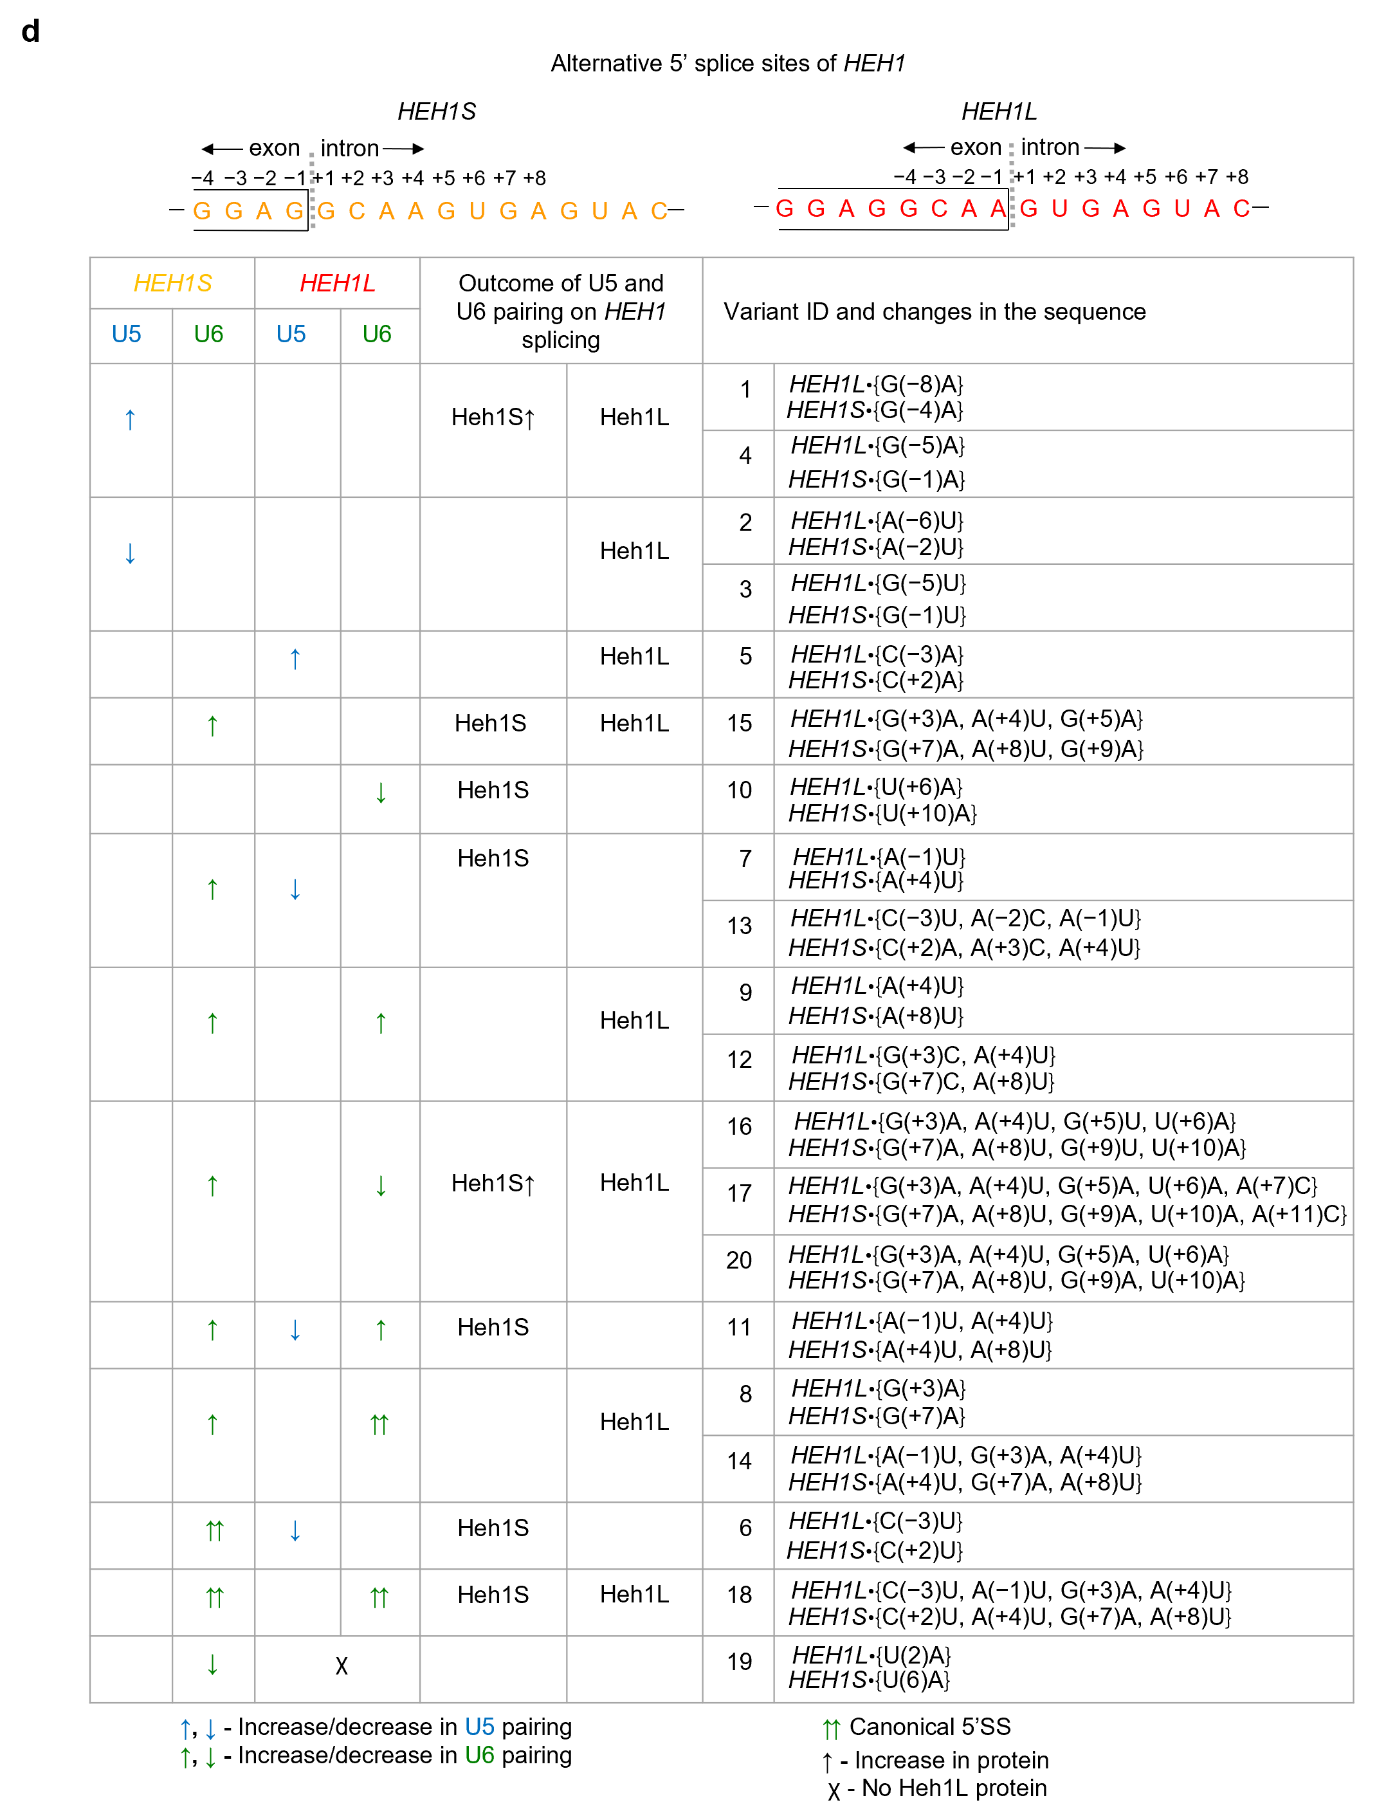


**Extended Data Fig. 2: Pairing of pre-mRNA variants with U5 and U6 snRNA and the outcome of *HEH1* alternative splicing. (d)** Sequence at the exon-intron boundary determines 5’SS selection**(d)** Summarizes how the pairing of U5 and U6 snRNA to the alternative 5’SS decide the splicing outcome of *HEH1* based on the data from Figure 1 and Figure S1*.*


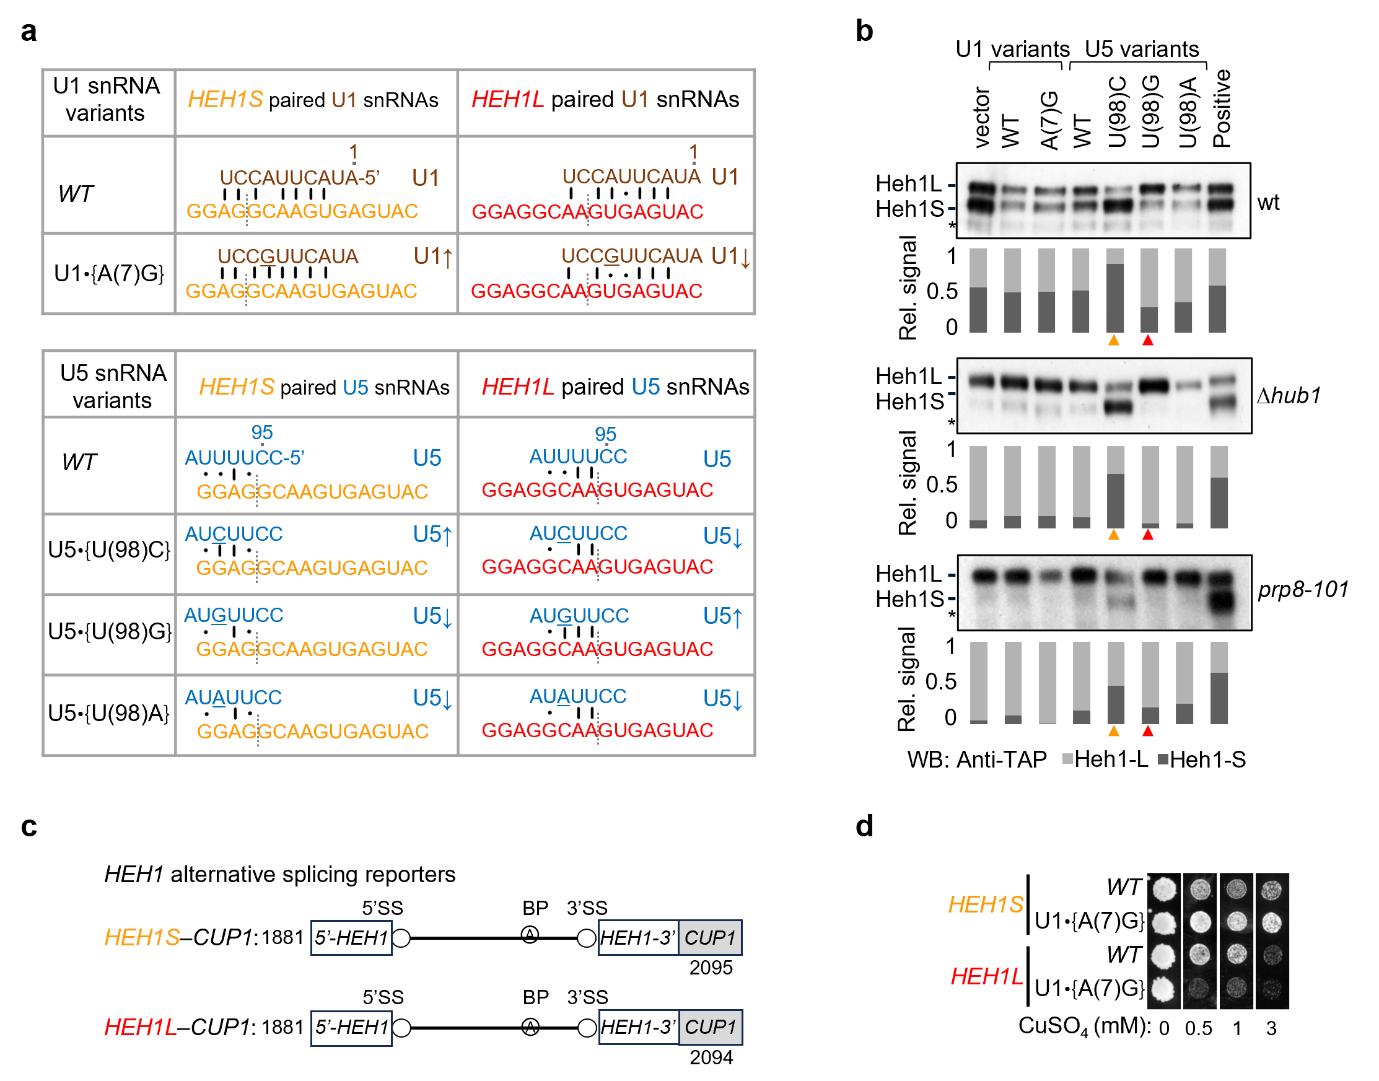


**Extended Data Fig. 3: *HEH1* alternative splicing in ∆*hub1 and prp8-101*. (a-d)** Upon over-expression of U1 and U5 snRNAs variants.

**(a)** The pairing ofU1 and U5 snRNA variants to *HEH1* alternative isoforms. Upward/downward arrows (↑/↓) indicate an increase/decrease in U5 / U6 pairing compared to *WT* snRNA. **(b)** All the variants were tested for their effect on splicing in wt, *∆hub1,* and *prp8-101* by western blot**.**Orange and red color upward triangles (▲) indicate higher levels of Heh1S and Heh1L, respectively. **(c)** Schematics of *HEH1-CUP1* alternative splicing reporters. U5 snRNA U(98)C variant enhances selection of *HEH1S* 5’SS, and U(98)G variant enhances selection of *HEH1L* 5’SS. **(d)** *HEH1* alternative splicing reporters and U1snRNA variant, U1 snRNA *WT*, and A(7)G variant. were co-transformed in the wt strain and spotted on indicated CuSO4 concentrations. U1 snRNA A(7)G enhances the U1 pairing to *HEH1S* 5’SS and reduces it to *HEH1L* 5’SS. The enhanced growth in *HEH1S*–*CUP1* and poor growth in *HEH1L*–*CUP1* upon U1•{A(7)G expression indicate that this variant showed expected defects in *HEH1L* 5’SS selection, but could not enhance selection of *HEH1S* 5’SS.

**
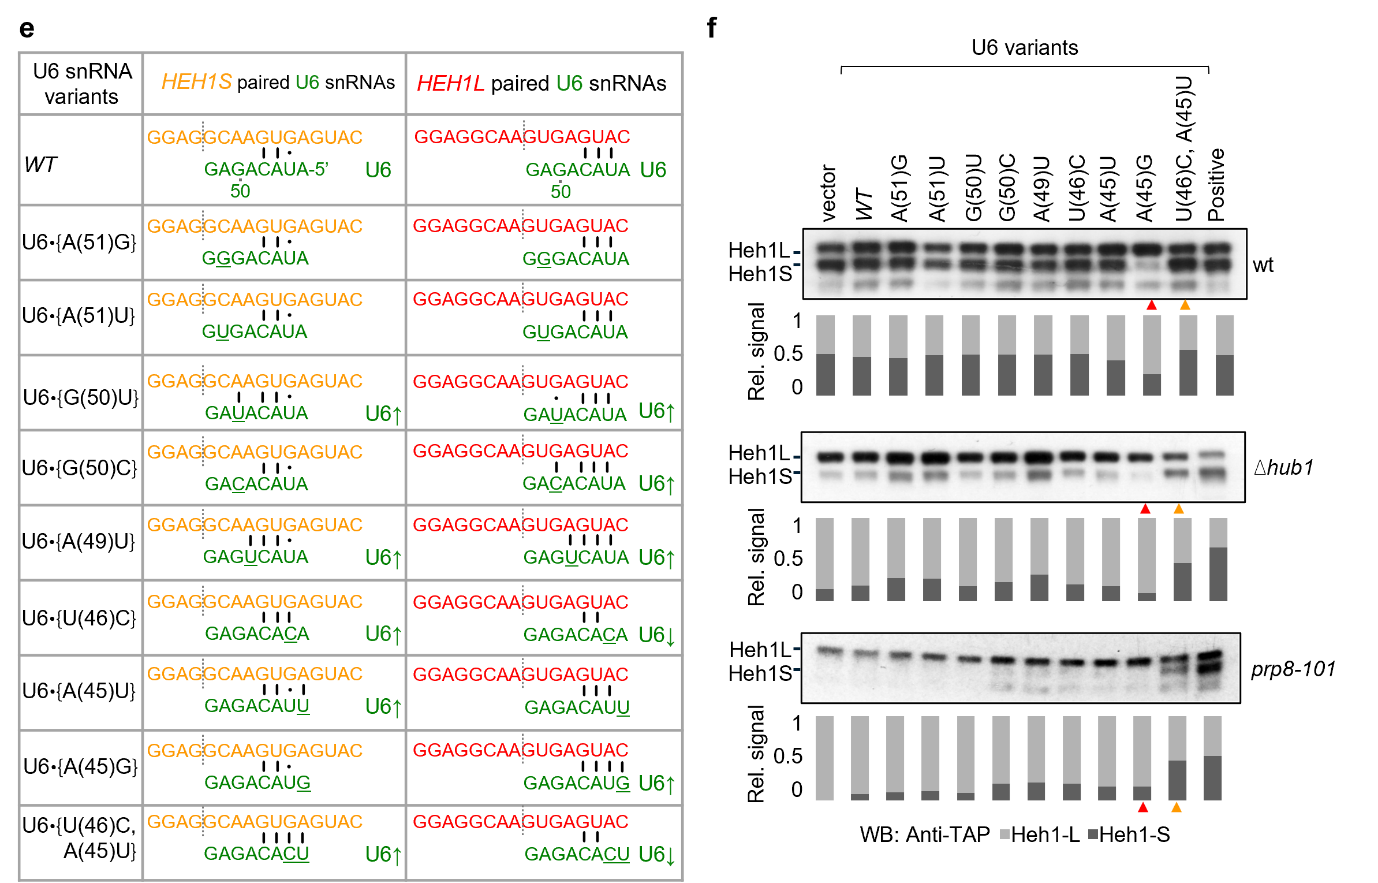
**

**Extended Data Fig. 3: *HEH1* alternative splicing in ∆*hub1 and prp8-101*. (e-f)** Upon over-expression of U6 snRNAs variants.

**(e)** Pairing ofU6 snRNA variants to *HEH1S* and *HEH1L* 5’SS. Upward/downward arrows indicate (↑/↓) increase/decrease in U6 snRNA pairing strength. **(f)** All the variants were tested for their effect on splicing in wt, *∆hub1,* and *prp8-101* by western blot.Orange and red upward triangles (▲) indicate a higher amount of Heh1S and Heh1L, respectively. A(45)G variant enhances selection of *HEH1L* 5’SS and U(46)C,A(45)U variant enhances selection of *HEH1S* 5’SS.


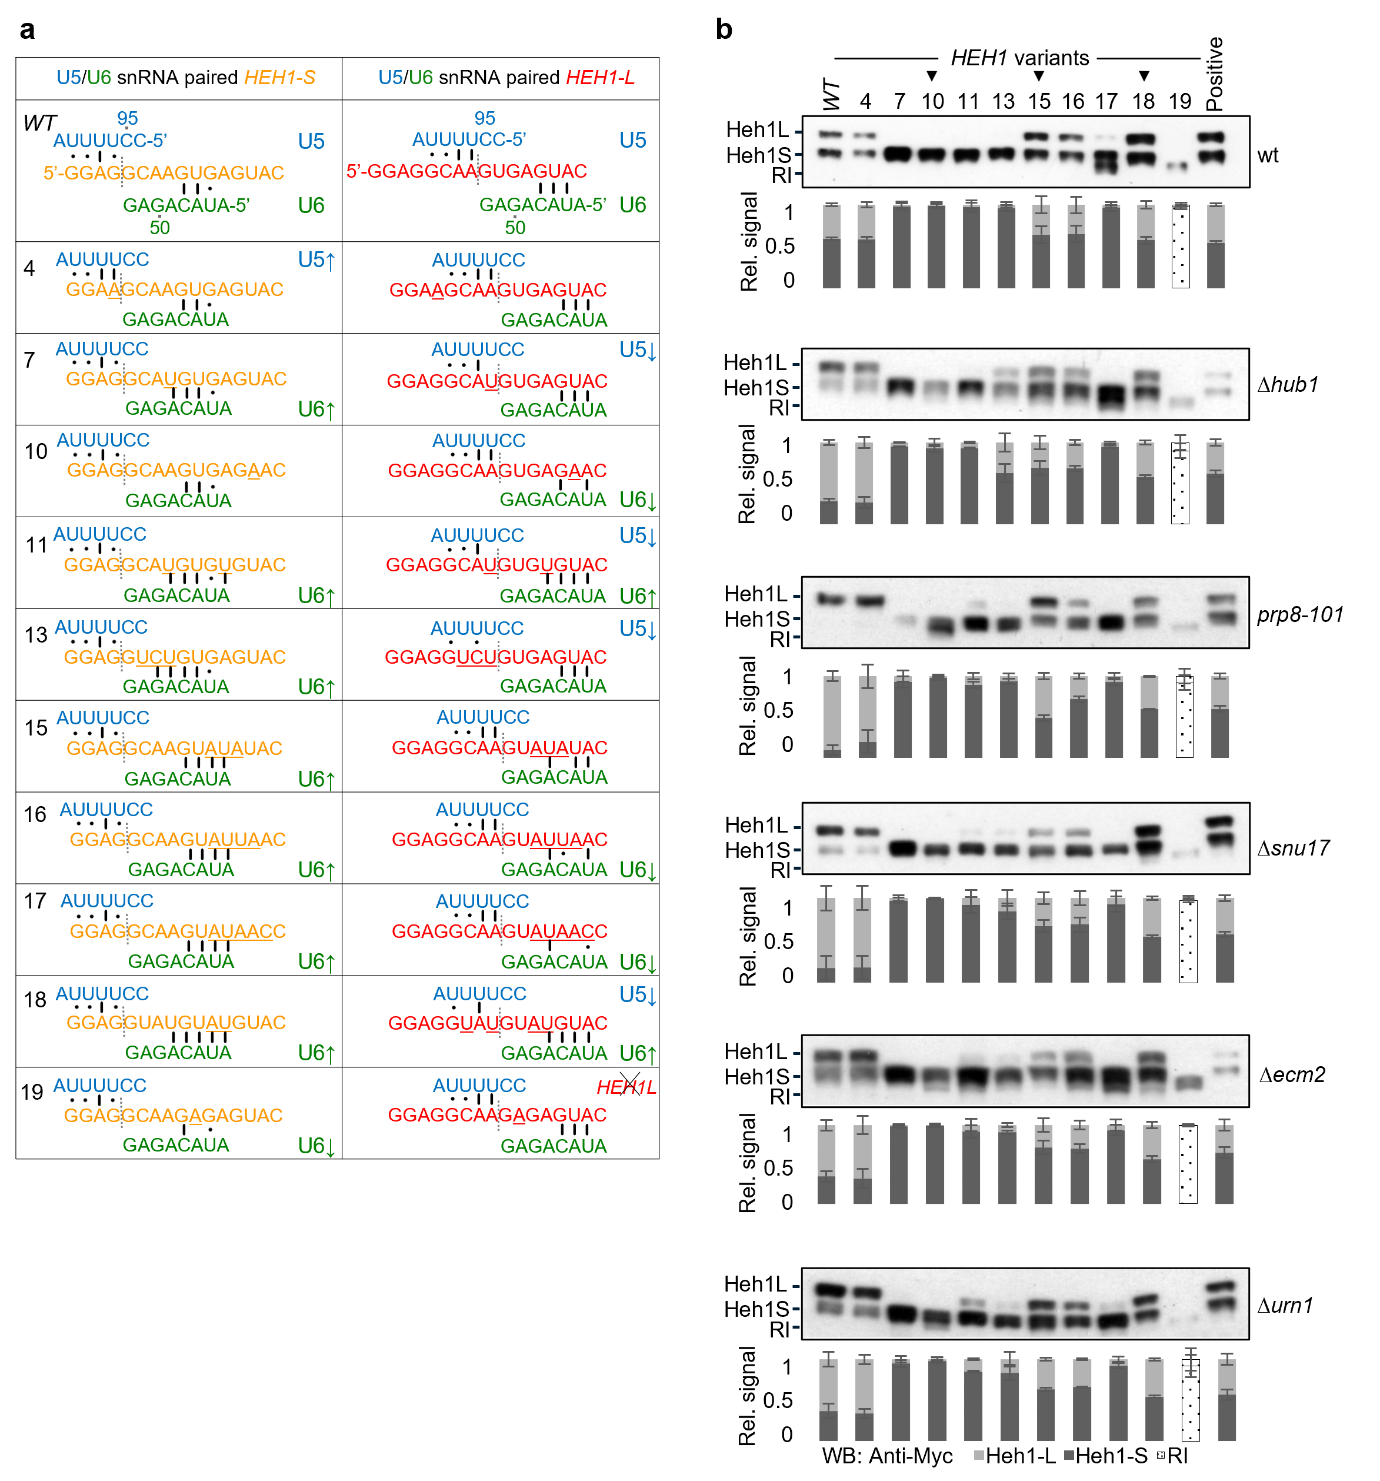


**Extended Data Fig. 4: Alternative splicing of *HEH1* pre-mRNA variants. (a-b)** Assay in the protein factors mutant.

**(a)** *HEH1* variants with functional *HEH1* 5’SS splicing was investigated. The binding of U5 and U6 snRNA was compared between the WT and selected variants. x indicates that *HEH1L* 5’SS is not functional in the variant. **(b)** Splicing efficiency of selected variants was monitored by Western blot. Data shown as mean ± s.d. (n=3 independent repeats)**.** RI represents the protein band translated from *HEH1* pre-mRNA with a retained intron.

**
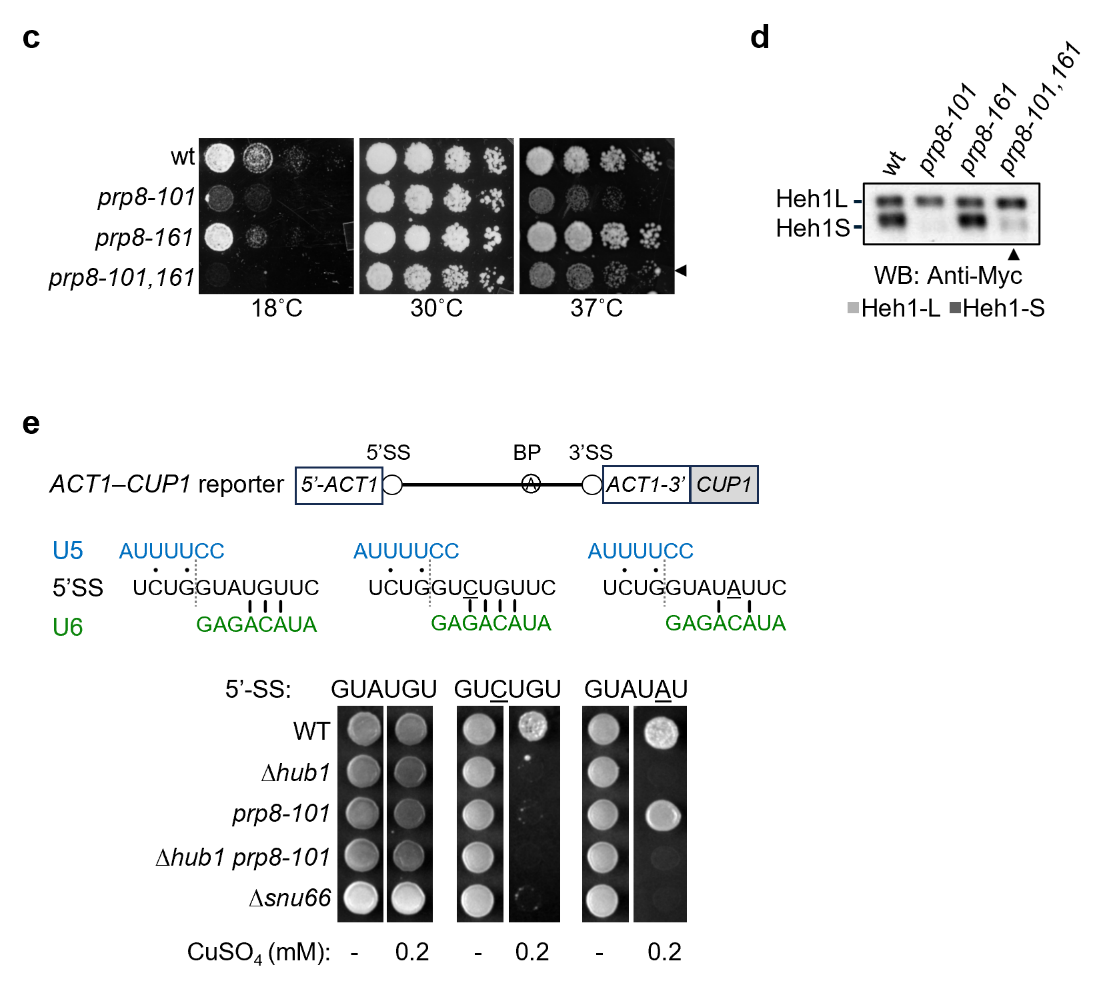
**

**Extended Data Fig. 4: Alternative splicing defect in *prp8-101*.(c-e)** Combining an opposing allele of *prp8* does not rescue the alternative splicing defect in *prp8-101*.

**(c)** ThePrp8 alleles, first step allele *prp8-101*(E1960K), second step allele, *prp8-161*(P986T), and both first and second alleles combined, *prp8-101,161,* were spotted and their growth was monitored at 18°C, 30°C, and 37°C. The left triangle (◄) marks the lack of rescue of the growth defect on combining the opposing allele. **(d)** The alleles were tested for *HEH1* alternative splicing by western blot. Combining the first step and the second step allele did not rescue the *HEH1* alternative splicing defect. The up triangle (▲) marks the lack of Heh1S in *prp8-101,161* **(e).** The *ACT1*–*CUP14* reporter was used to monitor splicing efficiency from non-canonical 5’SS /GUCUGU (also called A3C) and /GUAUAU (also called G5U) in *∆hub1*, *∆snu66,* and *prp8-101* by growth at different CuSO4 concentrations. The mutants showed defective splicing from both non-canonical 5’SS. *prp8-101* showed defects for A3C but not G5U.


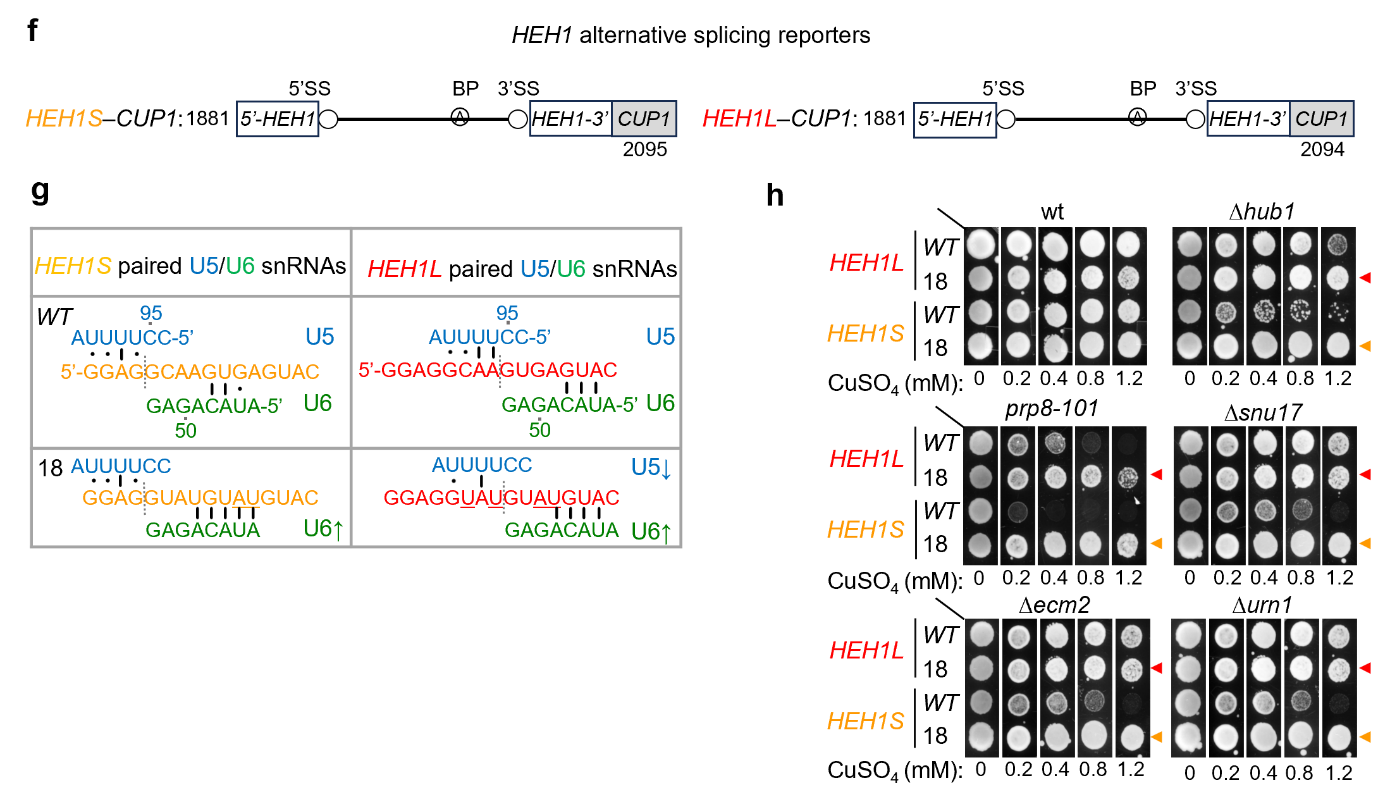


**Extended Data Fig. 4: Alternative splicing from the canonical 5’SS does not need the protein factors. (f-h)** The factors are redundant for alternative splicing from the canonical 5’SS.

**(f)** Schematic representation of *HEH1S*–*CUP1 and HEH1L*–*CUP1* reporter. **(g)** Variant 18 /GUAU/GUAUGU was made for both*HEH1S*–*CUP1 and HEH1L*–*CUP1* reporters, and its U5 and U6 pairing was compared**. (h)** The reporter variants were tested for their splicing efficiency at indicated CuSO4 concentrations (in mM). The orange and red colored left-pointed triangles (◄) indicate the fully restored growth indicative of normal splicing for *HEH1S*–*CUP1* and *HEH1L*–*CUP1* variants with canonical 5’SS. The reduced growth with *HEH1* 5’SS shows that suboptimal/non-canonical 5’SS have been chosen for its alternative splicing.

**References**

1. Jacquier, A., Rodriguez, J.R., and Rosbash, M. (1985). A Quantitative Analysis of the Effects of 5’ Junction and TACTAAC Box Mutants and Mutant Combinations on Yeast mRNA Splicing.

2. Yan, C., Wan, R., Bai, R., Huang, G., and Shi, Y. (2016). Structure of a yeast activated spliceosome at 3.5 Å resolution. Science (1979) *353*, 904–911.

3. Wan, R., Bai, R., Yan, C., Lei, J., and Shi, Y. (2019). Structures of the Catalytically Activated Yeast Spliceosome Reveal the Mechanism of Branching. Cell *177*, 339-351.e13.

4. Lesser, C.F., and Guthrie, C. (1993). Mutational Analysis of pre-mRNA Splicing in Saccharomyces cerarisiae Using a Sensitive New Reporter Gene, CUPl.
